# Supplementary material for: Acaricide Resistance Development in Rhipicephalus (Boophilus) microplus (Acari: Ixodidae) Populations against Amitraz and Deltamethrin on Communal Farms of the King Sabata Dalindyebo Municipality, South Africa
Source: MDPI journal article supplement (doi:10.3390/pathogens12070875), 2023-06-26
Supplement: s1 [file s1]

# Acaricide Resistance Development in *Rhipicephalus (Boophilus) microplus* (Acari: Ixodidae) Populations against Amitraz and Deltamethrin on Communal Farms of the King Sabata Dalindyebo Municipality, South Africa

William Diymba Dzemo <sup>1,2,\*</sup>, Patrick Vudriko <sup>3</sup>, Tsepo Ramatla <sup>2</sup> and Oriel Thekisoe <sup>2</sup>

<sup>1</sup> Department of Biological and Environmental Sciences, Faculty of Natural Sciences, Walter Sisulu University, Mthatha 5117, South Africa

<sup>2</sup> Unit for Environmental Sciences and Management, North-West University, Potchefstroom 2531, South Africa; ra21205450@gmail.com (T.R.); oriel.thekisoe@nwu.ac.za (O.T.)

<sup>3</sup> Research Center for Tropical Diseases and Vector Control, Department of Veterinary Pharmacy, Clinics and Comparative Medicine, College of Veterinary Medicine, Animal Resources and Biosecurity, Makerere University, Kampala, P.O Box 7062, Uganda; patrick.vudriko@mak.ac.za

\* Correspondence: wdzemo@wsu.ac.za

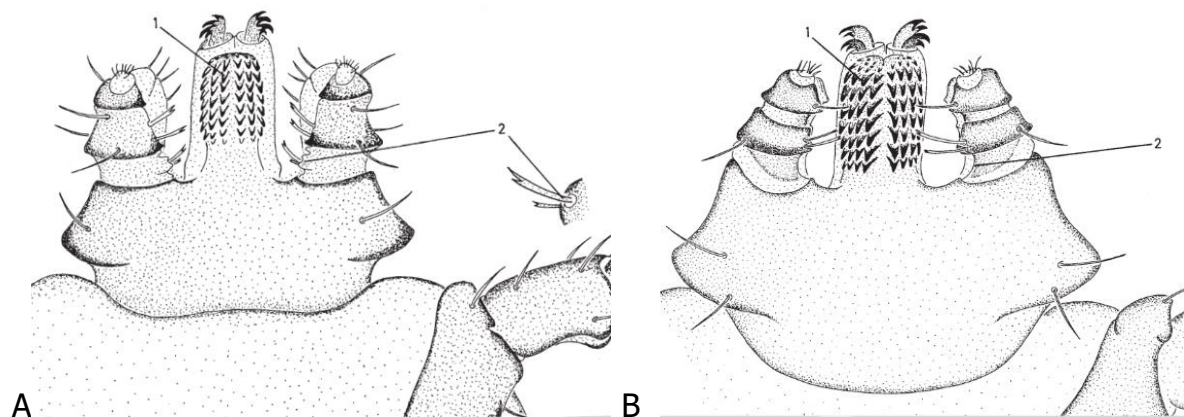

**Supplementary Figure S1:** Morphological keys used in the identification of *Rhipicephalus Boophilus* species, Walker et al. (2003). A: *Rhipicephalus B. microplus*; B: *Rhipicephalus B. decoloratus*.

| Sequences producing significant alignments                            |                                                                                                                                     |                                     | Download                |             | Select columns           |         | Show                                     | 100      | ?                          |
|-----------------------------------------------------------------------|-------------------------------------------------------------------------------------------------------------------------------------|-------------------------------------|-------------------------|-------------|--------------------------|---------|------------------------------------------|----------|----------------------------|
| <input checked="" type="checkbox"/> select all 100 sequences selected |                                                                                                                                     |                                     | <a href="#">GenBank</a> |             | <a href="#">Graphics</a> |         | <a href="#">Distance tree of results</a> |          | <a href="#">MSA Viewer</a> |
|                                                                       | Description                                                                                                                         | Scientific Name                     | Max Score               | Total Score | Query Cover              | E value | Per. Ident                               | Acc. Len | Accession                  |
| <input checked="" type="checkbox"/>                                   | <a href="#">Rhipicephalus microplus isolate HAI2 internal transcribed spacer 2, partial sequence</a>                                | <a href="#">Rhipicephalus mi...</a> | 1995                    | 2109        | 98%                      | 0.0     | 98.17%                                   | 1148     | <a href="#">MK224566.1</a> |
| <input checked="" type="checkbox"/>                                   | <a href="#">Rhipicephalus microplus isolate HE1 internal transcribed spacer 2, partial sequence</a>                                 | <a href="#">Rhipicephalus mi...</a> | 1995                    | 2109        | 98%                      | 0.0     | 98.17%                                   | 1151     | <a href="#">MK224560.1</a> |
| <input checked="" type="checkbox"/>                                   | <a href="#">Rhipicephalus microplus isolate JX-2 voucher NCCDCITS171 5.8S ribosomal RNA gene, partial sequence; intern...</a>       | <a href="#">Rhipicephalus mi...</a> | 1995                    | 2109        | 98%                      | 0.0     | 98.17%                                   | 1342     | <a href="#">MG721035.1</a> |
| <input checked="" type="checkbox"/>                                   | <a href="#">Rhipicephalus microplus clone 60_8908_763 18S ribosomal RNA gene, internal transcribed spacer 1, 5.8S riboso...</a>     | <a href="#">Rhipicephalus mi...</a> | 1995                    | 2109        | 98%                      | 0.0     | 98.17%                                   | 8908     | <a href="#">KY457506.1</a> |
| <input checked="" type="checkbox"/>                                   | <a href="#">Rhipicephalus microplus isolate 11-2 5.8S ribosomal RNA gene, partial sequence; internal transcribed spacer 2, c...</a> | <a href="#">Rhipicephalus mi...</a> | 1995                    | 2109        | 98%                      | 0.0     | 98.17%                                   | 1521     | <a href="#">KX450287.1</a> |
| <input checked="" type="checkbox"/>                                   | <a href="#">Rhipicephalus microplus isolate BomIB 5.8S ribosomal RNA gene, partial sequence; internal transcribed spacer 2...</a>   | <a href="#">Rhipicephalus mi...</a> | 1995                    | 2109        | 98%                      | 0.0     | 98.17%                                   | 1287     | <a href="#">KC503273.1</a> |
| <input checked="" type="checkbox"/>                                   | <a href="#">Rhipicephalus microplus isolate 2Ken 5.8S ribosomal RNA gene, partial sequence; internal transcribed spacer 2,...</a>   | <a href="#">Rhipicephalus mi...</a> | 1995                    | 2109        | 98%                      | 0.0     | 98.17%                                   | 1285     | <a href="#">KC503264.1</a> |
| <input checked="" type="checkbox"/>                                   | <a href="#">Rhipicephalus microplus isolate KN159 5.8S ribosomal RNA gene, partial sequence; internal transcribed spacer 2...</a>   | <a href="#">Rhipicephalus mi...</a> | 1995                    | 2109        | 98%                      | 0.0     | 98.17%                                   | 1324     | <a href="#">MW227651.1</a> |
| <input checked="" type="checkbox"/>                                   | <a href="#">Rhipicephalus microplus isolate 8023 5.8S ribosomal RNA gene, partial sequence; internal transcribed spacer 2,...</a>   | <a href="#">Rhipicephalus mi...</a> | 1995                    | 2109        | 98%                      | 0.0     | 98.17%                                   | 1346     | <a href="#">JQ625709.1</a> |
| <input checked="" type="checkbox"/>                                   | <a href="#">Rhipicephalus microplus isolate 9023 5.8S ribosomal RNA gene, partial sequence; internal transcribed spacer 2,...</a>   | <a href="#">Rhipicephalus mi...</a> | 1995                    | 2109        | 98%                      | 0.0     | 98.17%                                   | 1345     | <a href="#">JQ625705.1</a> |
| <input checked="" type="checkbox"/>                                   | <a href="#">Rhipicephalus microplus 5.8S ribosomal RNA gene, partial sequence; internal transcribed spacer 2, complete seq...</a>   | <a href="#">Rhipicephalus mi...</a> | 1995                    | 2109        | 98%                      | 0.0     | 98.17%                                   | 1340     | <a href="#">JF758642.1</a> |
| <input checked="" type="checkbox"/>                                   | <a href="#">Rhipicephalus microplus 5.8S ribosomal RNA gene, partial sequence; internal transcribed spacer 2, complete seq...</a>   | <a href="#">Rhipicephalus mi...</a> | 1995                    | 2109        | 98%                      | 0.0     | 98.17%                                   | 1342     | <a href="#">JF758640.1</a> |
| <input checked="" type="checkbox"/>                                   | <a href="#">Rhipicephalus microplus isolate HE3 internal transcribed spacer 2, partial sequence</a>                                 | <a href="#">Rhipicephalus mi...</a> | 1991                    | 2105        | 98%                      | 0.0     | 98.08%                                   | 1151     | <a href="#">MK224562.1</a> |
| <input checked="" type="checkbox"/>                                   | <a href="#">Rhipicephalus microplus isolate LD1 internal transcribed spacer 2, partial sequence</a>                                 | <a href="#">Rhipicephalus mi...</a> | 1989                    | 2103        | 98%                      | 0.0     | 98.08%                                   | 1151     | <a href="#">MK224573.1</a> |
| <input checked="" type="checkbox"/>                                   | <a href="#">Rhipicephalus microplus isolate HE4 internal transcribed spacer 2, partial sequence</a>                                 | <a href="#">Rhipicephalus mi...</a> | 1989                    | 2103        | 98%                      | 0.0     | 98.08%                                   | 1151     | <a href="#">MK224563.1</a> |
| <input checked="" type="checkbox"/>                                   | <a href="#">Rhipicephalus microplus isolate GZ1 internal transcribed spacer 2, partial sequence</a>                                 | <a href="#">Rhipicephalus mi...</a> | 1989                    | 2103        | 98%                      | 0.0     | 98.08%                                   | 1151     | <a href="#">MK224551.1</a> |
| <input checked="" type="checkbox"/>                                   | <a href="#">Rhipicephalus microplus isolate Itanagar 5.8S ribosomal RNA gene, partial sequence; internal transcribed spacer...</a>  | <a href="#">Rhipicephalus mi...</a> | 1989                    | 2103        | 98%                      | 0.0     | 98.08%                                   | 1341     | <a href="#">MK625221.1</a> |
| <input checked="" type="checkbox"/>                                   | <a href="#">Rhipicephalus microplus isolate Aizawl 5.8S ribosomal RNA gene, partial sequence; internal transcribed spacer 2,...</a> | <a href="#">Rhipicephalus mi...</a> | 1989                    | 2103        | 98%                      | 0.0     | 98.08%                                   | 1477     | <a href="#">MK621182.1</a> |

**Supplementary Figure S2:** BLASTn results showing the alignment of the *Rhipicephalus microplus* of this study and a corresponding sequence.
